# Supplementary material for: Postlactational involution biomarkers plasminogen and phospho-STAT3 are linked with active age-related lobular involution
Source: Springer Nature journal article supplement (doi:10.1007/s10549-017-4413-3), 2017-07-27

**Supplementary Figure 1. Negative controls for each stain.** All images are at the same magnification. *Scale bar 100 μm.*

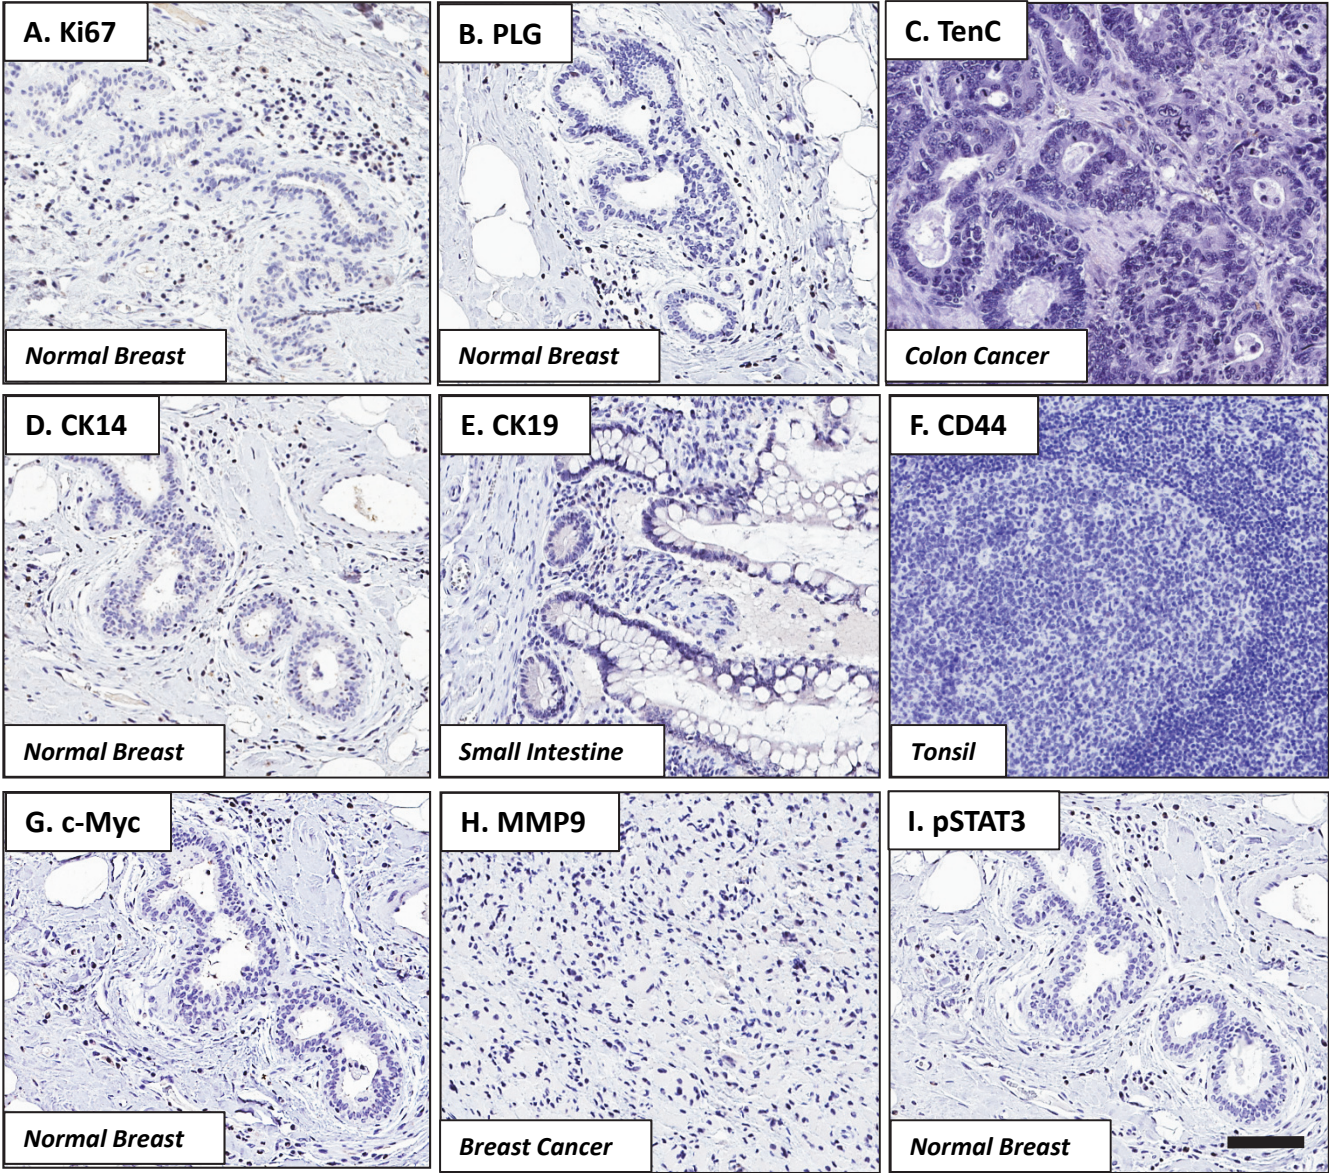

**Supplementary Figure 2. Images depicting low/moderate/high expression for Plasminogen (A) and pSTAT3 (B). All images are at the same magnification. *Scale bar* 100  $\mu$ m.**

**A. Plasminogen**

Low Expression

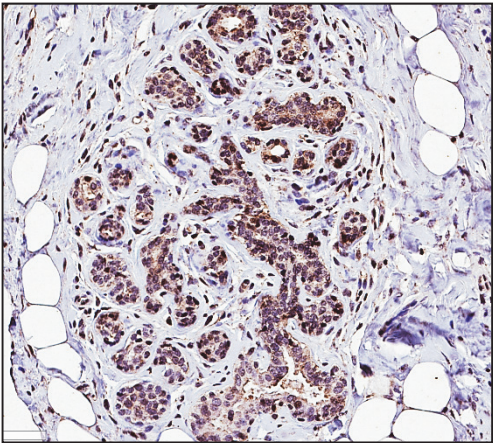

Moderate Expression

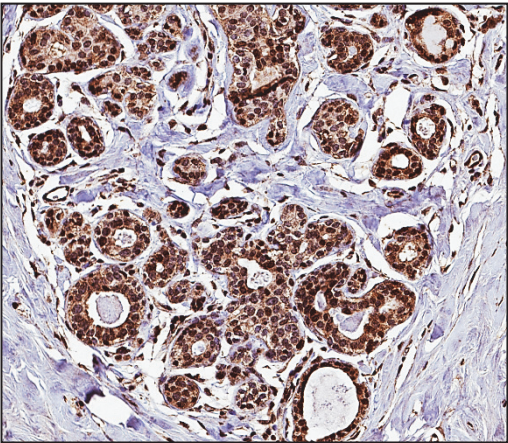

High Expression

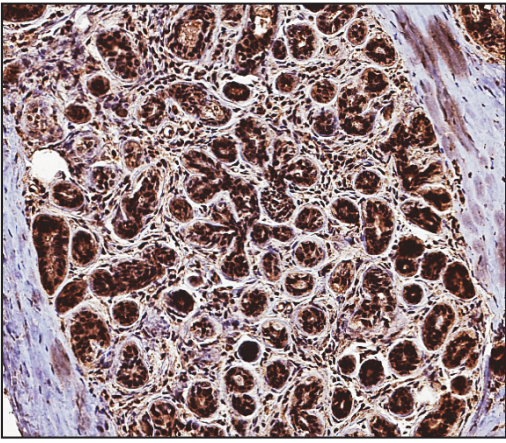

**B. pSTAT3**

Low Expression

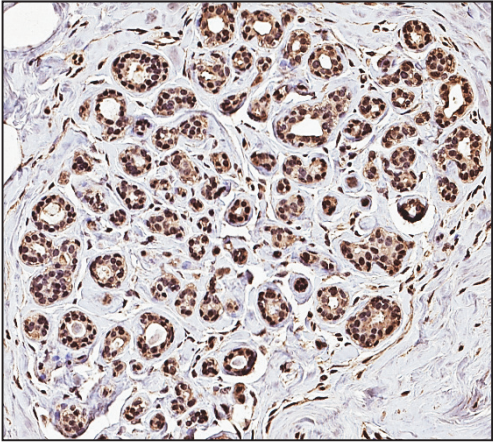

Moderate Expression

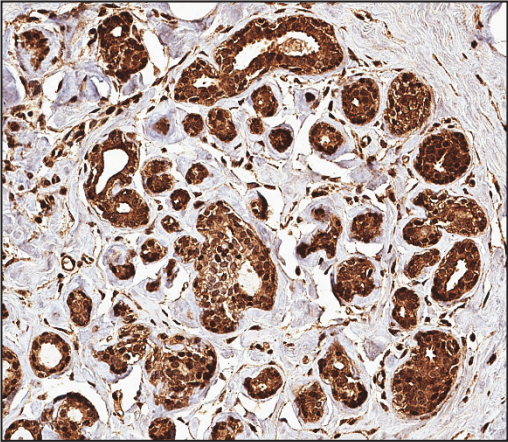

High Expression

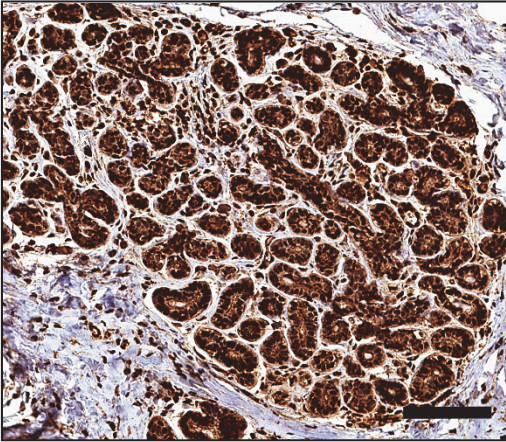

**Supplementary Figure 3. Images depicting higher Plasminogen/lower pSTAT3 staining for two patients showing progressive LI (A) and lower Plasminogen/higher pSTAT3 for two cases showing non-progressive LI (B). All images are at the same magnification. Scale bar 50  $\mu$ m.**

**A. Progressive LI**

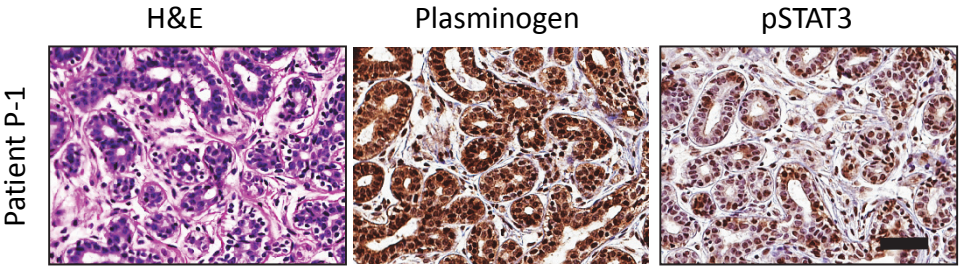

**B. Non-progressive LI**

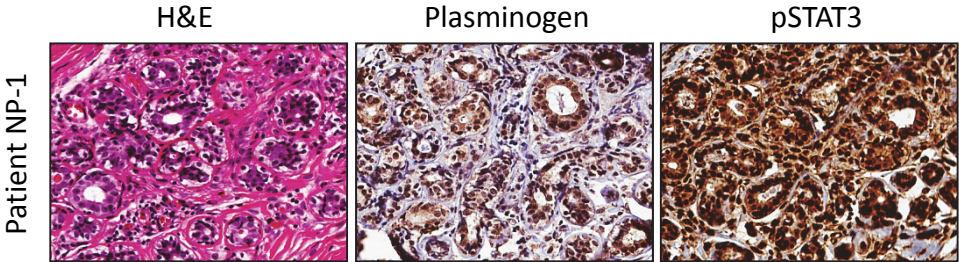

Supplement: MOESM2 [file 13333346]
